# Supplementary material
Source: HighWire-hosted journal article supplement (https://jpet.aspetjournals.org/highwire/filestream/142988/field_highwire_adjunct_files/0/JPET_SI_final.pdf)
Supplement: JPET_SI_final.pdf [file JPET_SI_final.pdf]

Supplemental information for:

**A novel peptide restricts ethanol modulation of the BK channel *in vitro* and *in vivo***

Luisa L. Scott, Sangeetha Iyer, Ashley E. Philpo, Melva N. Avalos, Natalie S. Wu, Ted Shi, Brooke A. Prakash, Thanh-Tu Nguyen, S. John Mihic, Richard W. Aldrich, Jonathan T. Pierce

Waggoner Center for Alcohol and Addiction Research, The University of Texas at Austin, Austin, TX, 78712 (LLS, SI, AEP, MNA, NSW, TS, BAP, T-TN, SJM, RWA, JTP)

Department of Neuroscience, The University of Texas at Austin, Austin, TX 78712 (SJM, RWA, JTP)

Center for Learning and Memory, The University of Texas at Austin, Austin, TX 78712 (RWA, JTP)

Running title: *Peptide restricts BK channel modulation by ethanol*

|             | wild type |                 |     |          | <i>slo-1</i> null |     |          | <i>hslo(+)</i> |     |          |
|-------------|-----------|-----------------|-----|----------|-------------------|-----|----------|----------------|-----|----------|
|             | treatment | speed (cm/min)  | N   | <i>p</i> | speed (cm/min)    | N   | <i>p</i> | speed (cm/min) | N   | <i>p</i> |
| <b>LS3</b>  | vehicle   | 1.12 ± 0.0292   | 126 |          | 0.505 ± .0186     | 210 |          | 0.507 ± 0.0272 | 111 |          |
|             | peptide   | 0.746 ± 0.0255  | 162 | 3.5E-21  | 0.469 ± 0.0169    | 205 | 0.16     | 0.340 ± 0.0208 | 110 | 1.9E-06  |
|             | veh+etoh  | 0.489 ± 0.0194  | 127 |          | 0.545 ± 0.0165    | 212 |          | 0.323 ± 0.0170 | 68  |          |
|             | pep+etoh  | 0.538 ± 0.0210  | 163 | 0.16     | 0.553 ± 0.0167    | 212 | 0.70     | 0.446 ± 0.0264 | 65  | 0.00011  |
| <b>LS10</b> | vehicle   | 1.29 ± 0.0331   | 149 |          | 0.498 ± 0.0315    | 77  |          | 0.674 ± 0.0403 | 128 |          |
|             | peptide   | 1.09 ± 0.0365   | 162 | 6.03E-05 | 0.527 ± 0.0399    | 80  | 0.56     | 0.617 ± 0.0426 | 116 | 0.34     |
|             | veh+etoh  | 0.676 ± 0.0486  | 103 |          | 0.562 ± 0.0235    | 76  |          | 0.385 ± 0.0242 | 74  |          |
|             | pep+etoh  | 0.905 ± 0.0510  | 113 | 0.0014   | 0.539 ± 0.0230    | 74  | 0.30     | 0.540 ± 0.0527 | 60  | 0.0052   |
| <b>LS11</b> | vehicle   | 1.31 ± 0.0300   | 89  |          | 0.500 ± 0.0186    | 103 |          | 0.669 ± 0.0387 | 127 |          |
|             | peptide   | 1.11 ± 0.0345   | 70  | 1.9E-05  | 0.528 ± 0.0282    | 94  | 0.40     | 0.418 ± 0.0302 | 122 | 7.4E-07  |
|             | veh+etoh  | 0.272 ± 0.0172  | 67  |          | 0.450 ± 0.0180    | 81  |          | 0.320 ± 0.0224 | 67  |          |
|             | pep+etoh  | 0.295 ± 0.0210  | 59  | 0.39     | 0.452 ± 0.0242    | 77  | 0.96     | 0.215 ± 0.0182 | 58  | 0.00052  |
| <b>LS13</b> | vehicle   | 0.828 ± 0.0509  | 73  |          | 0.592 ± 0.0356    | 93  |          | .579 ± 0.0427  | 73  |          |
|             | peptide   | 0.675 ± 0.0489  | 67  | 0.033    | 0.578 ± 0.0353    | 121 | 0.79     | 0.580 ± 0.0490 | 56  | 0.99     |
|             | veh+etoh  | 0.552 ± 0.0439  | 75  |          | 0.344 ± 0.0159    | 110 |          | 0.366 ± 0.0306 | 67  |          |
|             | pep+etoh  | 0.317 ± 0.0269  | 82  | 7.0E-06  | 0.0365 ± 0.0204   | 115 | 0.44     | 0.372 ± 0.0275 | 58  | 0.88     |
| <b>LS19</b> | vehicle   | 0.855 ± 0.0250  | 164 |          | 0.500 ± 0.0219    | 171 |          | 0.583 ± 0.0347 | 128 |          |
|             | peptide   | 0.7419 ± 0.0208 | 159 | 0.0012   | 0.487 ± 0.0241    | 160 | 0.72     | 0.482 ± 0.0325 | 133 | 0.034    |
|             | veh+etoh  | 0.392 ± 0.0203  | 167 |          | 0.365 ± 0.0189    | 159 |          | 0.458 ± 0.0327 | 76  |          |
|             | pep+etoh  | 0.291 ± 0.0173  | 140 | 0.00024  | 0.395 ± 0.0209    | 168 | 0.22     | 0.451 ± 0.0353 | 67  | 0.89     |

Table S1. A comparison of crawl speeds between worms treated with vehicle or select peptides

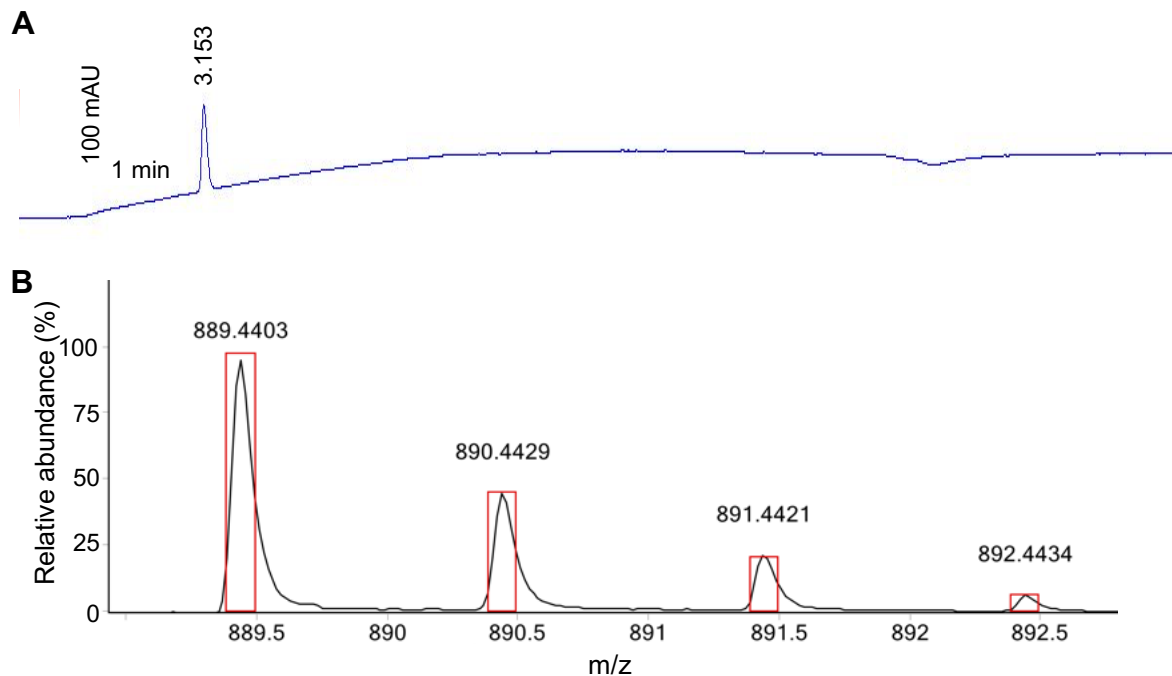

Figure S1. **LC/MS confirmed purity and identity of LS10.** **A**, HPLC traces showed a single peak absorbance at 3.153 min. 1-17 min of 214 nM trace shown. **B**, The mass spectrum indicates a molecular weight of 889 g/mol, as predicted for the peptide.

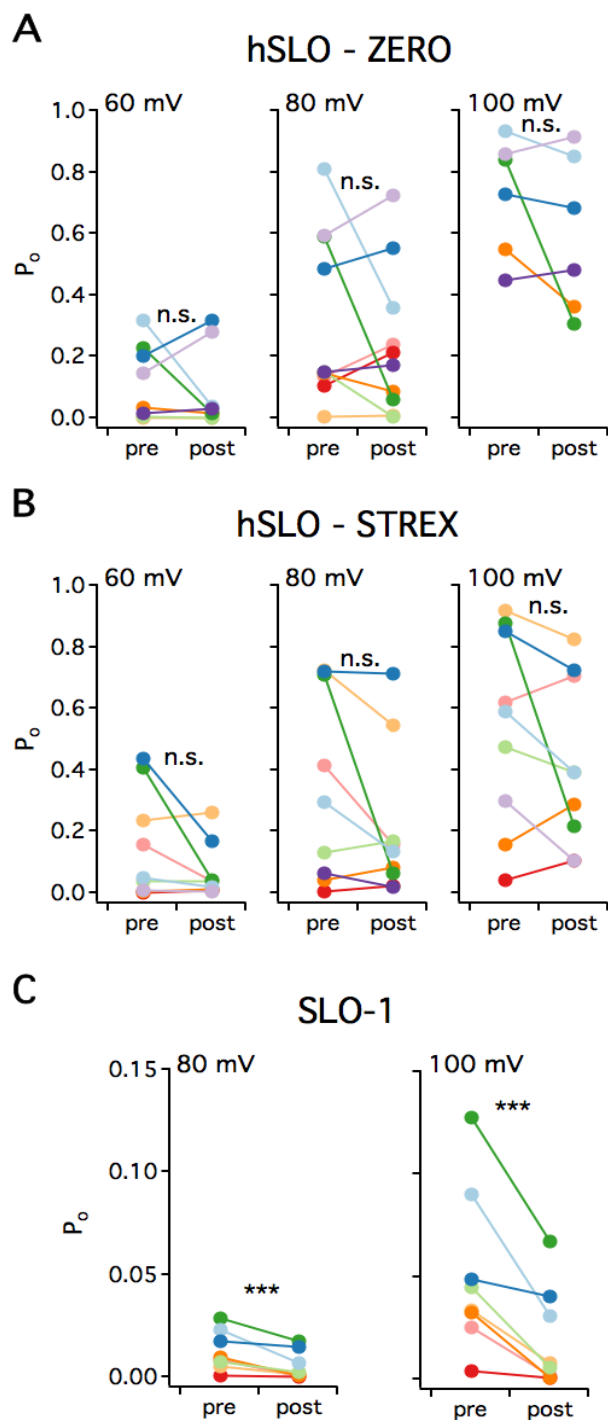

**Figure S2. Peptide LS10 consistently reduces the probability of opening for the worm but not the human BK channel.** Human (hSLO) or worm (SLO-1) BK $\alpha$  channels were recorded in inside-out patches. 500-nM LS10 was applied by diffusion to the extracellular face. The  $P_o$  at the start of the recording (pre) was measured using at least five 3-second traces recorded over a duration of ~5 minutes. The  $P_o$  was again assessed 15-30 minutes later (post). Each patch represented by a unique color for datasets plotted in **A-C**. **A**, The ZERO isoform of hSLO did not show a consistent change in  $P_o$  in response to LS10 application. **B**, The STREX isoform of hSLO also did not show a consistent change in  $P_o$ . hSLO expressed in HEK293 cells. Intracellular solution: ~750 nM Ca $^{2+}$ , 0 Mg $^{2+}$ . Pre vs. post, paired Student's  $t$ -tests, n.s. **C**, SLO-1 showed a significant decrease in  $P_o$  in response to LS10 application. SLO-1 expressed in oocytes. Intracellular solution: ~5  $\mu$ M Ca $^{2+}$ , 0 Mg $^{2+}$ . Pre vs. post, paired Student's  $t$ -tests, \*\*\* $p < 0.005$ .

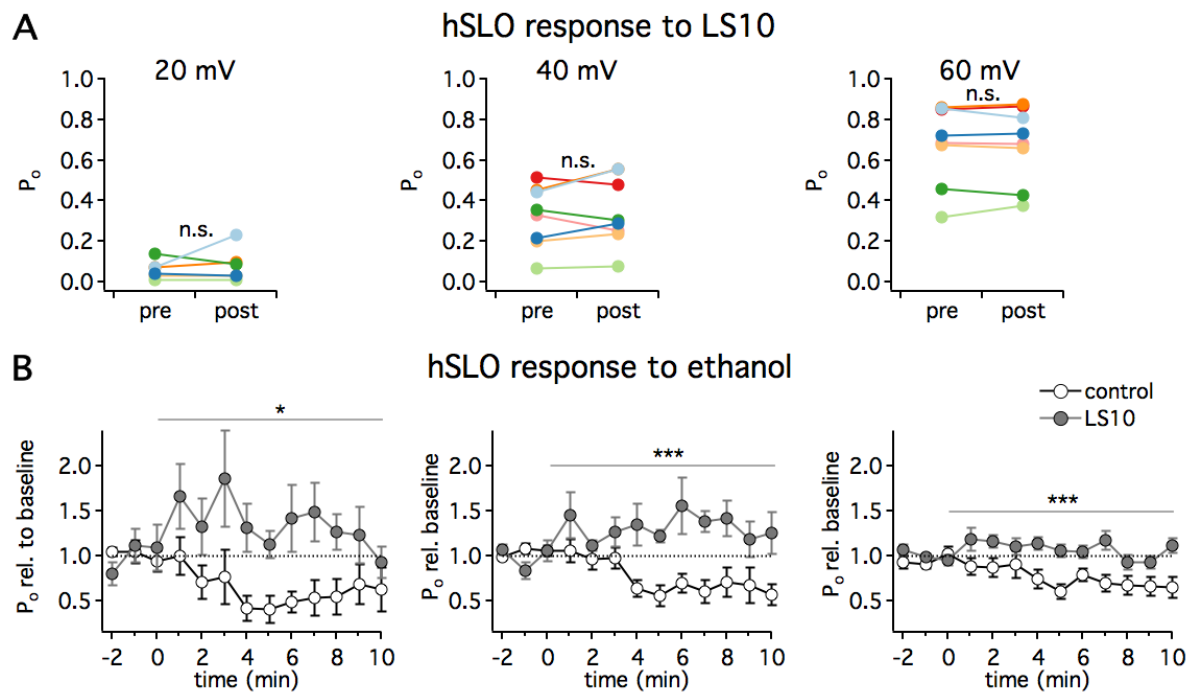

**Figure S3. Peptide LS10 restricts ethanol modulation without altering basal probability of opening for human BK channels.** Human (hSLO-ZERO) BK $\alpha$  channels were recorded in inside-out patches. 500-nM LS10 was applied by diffusion to the extracellular face. The  $P_o$  at the start of the recording (pre in **A**) was measured using at least ten 3-second traces recorded over a duration of several minutes. The  $P_o$  was again assessed 15 minutes later (post in **A**, baseline in **B**). **A**, hSLO showed no change in  $P_o$  in response to LS10 application. Data for each patch represented by a unique color. Pre vs. post, paired Student's  $t$ -tests, n.s. **B**, After bath application of 50-mM ethanol (time = 0), control (open) recordings showed a decrease in  $P_o$ . Preincubation with LS10 (shaded) restricted the ethanol-induced decrease in  $P_o$ .  $P_o$  measured each minute using three 3-second traces and plotted relative to baseline as mean  $\pm$  SEM. Two-way repeated measures ANOVA showed a main effect of peptide treatment on the response to ethanol: 20 mV,  $F(1, 11)=5.70$ ,  $*p<0.05$ ; 40 mV,  $F(1, 15)=16.63$ ,  $***p<0.001$ ; 60 mV,  $F(1, 16)=21.26$ ,  $***p<0.001$ . hSLO expressed in HEK293 cells. Intracellular solution:  $\sim 638$  nM Ca $^{2+}$ , 2 mM Mg $^{2+}$ .
